# Supplementary material
Source: ML conference proceedings conference paper supplement (https://openreview.net/forum?id=fTdhM7q1o2)
Supplement: supplementary_material [file attachment]

# REWARD LEARNING FROM PREFERENCE WITH TIES

**Anonymous authors**

Paper under double-blind review

## ABSTRACT

Reward learning plays a pivotal role in Reinforcement Learning from Human Feedback (RLHF), ensuring the alignment of language models. The Bradley-Terry (BT) model stands as the prevalent choice for capturing human preferences from datasets containing pairs of chosen and rejected responses. In preference modeling, the focus is not on absolute values but rather on the reward difference between chosen and rejected responses, referred to as preference strength. Thus, precise evaluation of preference strength holds paramount importance in preference modeling. However, an easily overlooked factor significantly affecting preference strength measurement is that human attitudes towards two responses may not solely indicate a preference for one over the other and ties are also a common occurrence. To address this, we propose the adoption of the generalized Bradley-Terry model – the Bradley-Terry model with ties (BTT) – to accommodate tied preferences, thus leveraging additional information. We prove that even with the access to the true distributions of prompt and response, disregarding ties can lead to a notable bias in preference strength measurement. Comprehensive experiments further validate the advantages of incorporating ties in preference modeling. Notably, fine-tuning with BTT significantly outperforms fine-tuning with BT on synthetic preference datasets with ties, labeled by state-of-the-art open-source LLMs.

## 1 INTRODUCTION

Reinforcement learning from human feedback (RLHF) (Christiano et al., 2017; Ziegler et al., 2019; Ouyang et al., 2022) has played a pivotal role in aligning large language models (LLMs) (Kenton et al., 2021), enhancing specific capabilities of LLMs in various fields, such as summarization (Stiennon et al., 2020), coding (Gao et al., 2023), and medical assistance (Moor et al., 2023). A crucial component of the RLHF process is the reward model, which serves as the primary mechanism for integrating human preferences and feedback into the learning process (Wang et al., 2024). The reward model guides the optimization procedure of RLHF towards objectives aligned with human preferences (Kaufmann et al., 2023). Therefore, the accuracy of the reward model greatly affects or even determines the effectiveness of alignment with human preferences. Moreover, the direct preference optimization (DPO) method (Rafailov et al., 2024) utilizes LLMs to implicitly represent the reward model through mathematical transformations, bypassing the complex RL optimization phase and focusing solely on the reward modeling phase. As a simplified alternative to RLHF, DPO has demonstrated computational efficiency and competitive performance compared to RLHF.

To learn a reward model from human preferences, obtaining high-quality human preference data is crucial (Wang et al., 2024), typically achieved by having human labelers annotate previously collected data consisting of a prompt and a pair of responses (Ouyang et al., 2022; Bai et al., 2022). Conventional approaches (Rafailov et al., 2024; Ziegler et al., 2019; Stiennon et al., 2020) often assume that the latent human preference model follows the Bradley-Terry (BT) (Bradley & Terry, 1952) model, where the preference distribution can be expressed as:

$$p_r(y_1 \succ y_2 | x) = \frac{\exp(r(x, y_1))}{\exp(r(x, y_1)) + \exp(r(x, y_2))} = \sigma(-\Delta r)$$

where  $r$  is the latent reward model,  $\sigma$  is sigmoid function, and  $\Delta r = r(x, y_1) - r(x, y_2)$  is preference strength. Consequently, human labelers are presented with only two options for each prompt  $x$  and pair of responses  $y_1$  and  $y_2$ : either  $y_1$  is preferred or  $y_2$  is preferred. However, this approach does

not fully align with human attitudes towards preferences, as humans often perceive two responses as ties when their rewards have very little difference. To illustrate this point, we refer to the findings of Wang et al. (2024) due to the scarcity of preference datasets including ties. In their study, 10 different reward models are trained on Anthropic’s HH-RLHF (Bai et al., 2022) dataset assuming the BT preference model. The mean and standard deviation of these 10 reward models can partially reflect the real human preferences of this dataset. From the results of Wang et al. (2024), the absolute value of the preference strength for a large amount of data is close to 0, indicating that the preference difference in these cases is minimal and the pair of responses can often be considered as ties. We provide examples of data with small absolute mean preference strength in Table 1 to further emphasize the importance of introducing ties in preferences.

Table 1: Examples of pairs of responses with low absolute mean preference strength in the annotated Anthropic’s HH-RLHF dataset (Wang et al., 2024).

|                     |                                                                                                                                                                                                                                                                                                                                                                                                                              |
|---------------------|------------------------------------------------------------------------------------------------------------------------------------------------------------------------------------------------------------------------------------------------------------------------------------------------------------------------------------------------------------------------------------------------------------------------------|
| Prompt              | <b>Can you help me set up an outdoor running routine so that I can get in shape?</b>                                                                                                                                                                                                                                                                                                                                         |
| Chosen Response     | What kind of running are you interested in?                                                                                                                                                                                                                                                                                                                                                                                  |
| Rejected Response   | Sure, what kind of program are you looking for?                                                                                                                                                                                                                                                                                                                                                                              |
| Preference Strength | Mean : 0.0027, Standard Deviation: 0.22                                                                                                                                                                                                                                                                                                                                                                                      |
| Prompt              | <b>Can you tell me what the meaning and themes are of the book Oliver Twist</b>                                                                                                                                                                                                                                                                                                                                              |
| Chosen Response     | Sure, here are some common themes, and there are a few interpretations that scholars have proposed: - the evil and temptations of London, - the books portray Oliver as a victim of the harsh society, - Oliver is also a victim of his situation, - the story is an attack on                                                                                                                                               |
| Rejected Response   | The meaning of the book is about the theme of being homeless and being poor. This is an important thing in the society we live in today. When we have children, we want them to be able to live a good life with lots of opportunities. However, we don’t have all the resources to provide that to them. So the book is about the struggles of poor people trying to live a life with a family, which is difficult and sad. |
| Preference Strength | Mean : 0.0, Standard Deviation: 0.36                                                                                                                                                                                                                                                                                                                                                                                         |
| Prompt              | <b>I want to purchase a men’s suit, but I don’t know what I am looking for or how to get started.</b>                                                                                                                                                                                                                                                                                                                        |
| Chosen Response     | Sure! In what price range are you looking to spend?                                                                                                                                                                                                                                                                                                                                                                          |
| Rejected Response   | Great, let me walk you through the process. First we’ll start with the size, do you know your measurements?                                                                                                                                                                                                                                                                                                                  |
| Preference Strength | Mean : 0.00019, Standard Deviation: 0.23                                                                                                                                                                                                                                                                                                                                                                                     |

In this paper, we propose to model human preferences with the Bradley-Terry model with ties (BTT) (Rao & Kupper, 1967). We demonstrate that if we blindly adopt BT as our preference model (with the true latent preference model being BTT) can lead to significant bias in measuring preference strength due to model mismatch. To illustrate the model mismatch problem occurring in conventional preference datasets lacking ties when simply assuming the latent preference model is BT, we first introduce a simulated preference generation procedure. Specifically, we generate two preference datasets—one with ties and one without ties. By analyzing the maximum likelihood estimates (MLE) based on BTT and BT preference models on these datasets respectively, we quantify the bias in measuring preference strength due to the model mismatch. Furthermore, we show that although the bias term is bounded, it can still have a substantial impact. Since most conventional preference datasets lack ties, we propose a novel method to address the preference model mismatch problem, which subtracts the bias term from the MLE loss function to recover the true preference strength measurement. This method can be viewed as a variant of adaptive margin (Touvron et al., 2023) when training the reward model and a variant of DPO with offset (ODPO) when training DPO (Amini et al., 2024). To further demonstrate the benefit of incorporating ties in preference modeling, we use state-of-the-art open-source LLMs to simulate human judgment and label ties in a conventional preference dataset without ties, and then evaluate the fine-tuned models on this synthetic preference dataset with ties. It is important to note that the main limitation of this paper is

the inability to conduct experiments on real human-labeled preference datasets with ties, due to the scarcity of such datasets and the high cost of manual annotation and evaluation. Addressing this limitation could be considered for future work.

**Main Contributions.** Our contributions can be outlined as follows:

- We advocate for the inclusion of tie options when labeling preference data, aligning with human preference habits. To the best of our knowledge, we are the first to propose the use of BTT to model human preference.
- We derive the bias in measuring preference strength caused by model mismatch when assuming the latent preference model is BTT. To address this, we propose a novel bias-correction method to mitigate this bias in conventional preference datasets without ties, as validated by comprehensive experimental results.
- We generate a synthetic preference dataset with ties, labeled by state-of-the-art open-source LLMs, and evaluate fine-tuning with BTT and BT on this dataset. The results show that fine-tuning with BTT consistently outperforms fine-tuning with BT.

## 2 RELATED WORK

The reward model plays a crucial role in RLHF, guiding LLMs towards objectives aligned with human preferences (Christiano et al., 2017; Kaufmann et al., 2023). Recent related work has addressed various aspects of reward modeling. Wang et al. (2024) conducted a comprehensive study on reward models, proposing a method to measure the strength of preferences within the data and introducing contrastive learning to enhance the ability of reward models to distinguish between chosen and rejected responses. Zhu et al. (2024) analyzed reward overfitting and overoptimization problems in RLHF, proposing to mitigate them using an iterative data smoothing method. Dai et al. (2023) proposed training a cost model in addition to the reward model to decouple human preferences regarding helpfulness and harmlessness.

As a simplified alternative to RLHF, DPO (Rafailov et al., 2024) has achieved significant success and impact. The core concept of DPO involves implicitly representing the reward model using LLMs through a clever reparameterization. Recently, there has been extensive research focused on enhancing and broadening the scope of DPO. Amini et al. (2024) propose DPO with an offset (ODPO), where the likelihood difference between the preferred and dispreferred response must exceed an offset value. Zhou et al. (2023) extend DPO for multiple alignment objectives by training LMs as implicit collective reward models, combining all objectives with specific weightings. Chowdhury et al. (2024) propose robust DPO methods to mitigate the bias introduced by noise in preference data on average.

The preference model serves as the foundation for reflecting human feedback, with the Bradley-Terry (BT) model (Bradley & Terry, 1952) being the most commonly used preference model in RLHF. Indeed, various generalized models based on the BT model have been proposed to address different scenarios, such as handling home advantage (Agresti, 2012), ties (Rao & Kupper, 1967), multiple comparisons (Plackett, 1975; Luce, 2005), and team comparisons (Huang et al., 2006). In particular, the Plackett-Luce (PL) model, a popular extension for handling multiple comparisons, has also found application in RLHF (Zhu et al., 2023; Song et al., 2024).

## 3 PRELIMINARIES

**RLHF** typically comprises three phases: supervised fine-tuning (SFT), reward learning, and reinforcement learning. In the first phase, a pre-trained language model undergoes fine-tuning via supervised learning on high-quality data tailored for specific tasks such as dialogue and summarization. This fine-tuning process yields the model  $\pi^{\text{SFT}}$ . The second phase involves reward learning on a preference dataset. To construct this dataset, prompts  $x \sim \mathcal{X}$  are fed to  $\pi^{\text{SFT}}$ , generating pairs of responses  $(y_1, y_2) \sim \pi^{\text{SFT}}(y | x)$ . These pairs are presented to human labelers, who express preferences. Conventional preference datasets do not allow ties and require one response to be preferred over the other, denoted as  $y_w \succ y_l | x$ , where  $y_w$  and  $y_l$  represent the preferred and dispreferred completions among  $(y_1, y_2)$ , respectively. The most popular approach to modeling preference is the

Bradley-Terry (BT) model, which assumes the human preference distribution  $p^*$  as:

$$p^*(y_1 \succ y_2 | x) = \frac{\exp(r^*(x, y_1))}{\exp(r^*(x, y_1)) + \exp(r^*(x, y_2))}. \quad (1)$$

where  $r^*(y, x)$  is the latent reward model which is inaccessible. Assuming access to a static dataset of comparisons  $\mathcal{D} = \{x^{(i)}, y_w^{(i)}, y_l^{(i)}\}_{i=1}^N$  sampled from  $p^*$ , we can parametrize a reward model  $r_\psi(x, y)$  and estimate the parameters via maximum likelihood. Framing the problem as a binary classification we have the negative log-likelihood loss:

$$\mathcal{L}_R(r_\psi, \mathcal{D}) = -\mathbb{E}_{(x, y_w, y_l) \sim \mathcal{D}} [\log \sigma(r_\psi(x, y_w) - r_\psi(x, y_l))],$$

where  $\sigma$  is the logistic function. And the third phase is to solve the following RL problem with the learned reward function:

$$\max_{\pi_\theta} \mathbb{E}_{x \sim \mathcal{D}, y \sim \pi_\theta(y|x)} [r_\psi(x, y)] - \beta \mathbb{D}_{\text{KL}}[\pi_\theta(y|x) \| \pi^{\text{SFT}}(y|x)], \quad (2)$$

where  $\beta$  is a parameter controlling the deviation from the base reference policy  $\pi^{\text{SFT}}$ .

**DPO** utilizes the fact that the optimization problem equation 2 has the closed form solution (Go et al., 2023; Korbak et al., 2022; Peng et al., 2019; Peters & Schaal, 2007):

$$\pi_r(y|x) = \frac{1}{Z(x)} \pi^{\text{SFT}}(y|x) \exp\left(\frac{1}{\beta} r(x, y)\right).$$

Then a clever reparameterization is applied to express the reward function in terms of its corresponding optimal policy  $\pi_r$ :

$$r(x, y) = \beta \log \frac{\pi_r(y|x)}{\pi^{\text{SFT}}(y|x)} + \beta \log Z(x).$$

Applying this reparameterization to the ground-truth reward  $r^*$  and corresponding optimal model  $\pi^*$ , then substituting this reparameterization into the BT model equation 1, analogous to the reward modeling approach, the loss function of DPO becomes:

$$\mathcal{L}_{\text{DPO}}(\pi_\theta; \pi_{\text{ref}}) = -\mathbb{E}_{(x, y_w, y_l) \sim \mathcal{D}} \left[ \log \sigma \left( \beta \log \frac{\pi_\theta(y_w|x)}{\pi^{\text{SFT}}(y_w|x)} - \beta \log \frac{\pi_\theta(y_l|x)}{\pi^{\text{SFT}}(y_l|x)} \right) \right].$$

**Bradley-Terry model with ties (BTT)** (Rao & Kupper, 1967) can be employed to model human preference with ties, i.e., the two response  $(y_1, y_2) \sim \pi^{\text{SFT}}(y|x)$  are considered equal with respect to the prompt  $x$ :

$$p_\theta^*(y_1 = y_2 | x) = \frac{(\theta^2 - 1) \exp(r^*(x, y_1)) \exp(r^*(x, y_2))}{(\exp(r^*(x, y_1)) + \theta \exp(r^*(x, y_2))) (\theta \exp(r^*(x, y_1)) + \exp(r^*(x, y_2)))}$$

$$p_\theta^*(y_1 \succ y_2 | x) = \frac{\exp(r^*(x, y_1))}{\exp(r^*(x, y_1)) + \theta \exp(r^*(x, y_2))} \quad (3)$$

where  $\theta \geq 1$  is the parameter controlling the tendency to ties, with a larger  $\theta$  indicating a higher probability of ties occurring. It's worth noting that when  $\theta = 1$ , the BTT model is equivalent to the BT model.

## 4 PREFERENCE MODELING WITH TIES

For a given reward model  $r$ , RLHF focuses not on the absolute values  $r(x, y_1), r(x, y_2)$  but on the preference strength between the pair of responses (Wang et al., 2024):

$$\Delta r = r(x, y_1) - r(x, y_2)$$

In this section, we will explain that if the real preference model is BTT, but we do not provide human labelers with the option of a tie to generate the preference dataset, the learned reward model will exhibit significant deviation from the real reward model in measuring preference strength.

#### 4.1 PREFERENCE DATASET UNDER BTT

Since previous preference datasets do not include ties, we will first explain the simulation process for obtaining a preference dataset without ties when assuming the preference model is BTT. Suppose we have  $n$  samples, each consisting of a prompt and a pair of responses, denoted as  $D = \{(x_i, y_i^1, y_i^2)\}_{i=1}^n$ . With  $D$  available, if we assume the true preference model is BTT, we can obtain preference datasets with and without ties using the following methods:

- Offer three options to human labelers:  $y_1 \succ y_2$ ,  $y_2 \succ y_1$ , or  $y_1 = y_2$ . Then, we can derive a preference dataset with ties  $D^{BTT}$  from the original dataset  $D$ . We denote that  $D^{BTT} = D^{BT} \cup D^T$ , where  $D^{BT} = \{(x_i, y_i^w, y_i^l)\}, y_i^w \succ y_i^l, i \in \mathcal{J}; D^T = \{(x_i, y_i^1, y_i^2)\}, y_i^1 = y_i^2, i \in \mathcal{K}$ , and  $\mathcal{J} \cup \mathcal{K} = \{n\}$ .
- For the ties dataset  $D^T$ , ask human labelers to further specify which response is preferred, resulting in the dataset  $D^{TTN} = \{(x_i, y_i^w, y_i^l)\}, y_i^w \succ y_i^l, i \in \mathcal{K}$ . We denote  $D^{BTTN} = D^{BT} \cup D^{TTN}$ .

**Assumption 4.1.** Human labelers randomly label responses in ties, assigning each response an equal probability of being preferred.

In summary, if we assume the preference model is the BTT model and provide the option for ties to human labelers, we obtain the preference dataset with ties  $D^{BTT}$ . By subsequently asking human labelers to specify preferred responses within ties, we derive the preference dataset without ties  $D^{BTTN}$ . Therefore, we can consider conventional preference datasets without ties as  $D^{BTTN}$ .

#### 4.2 BIAS IN MEASURING PREFERENCE STRENGTH

Assuming we have both  $D^{BTT}$  and  $D^{BTTN}$  derived from  $D$ , we can illustrate how to estimate the latent reward model using maximum likelihood estimation (MLE). Since we assume that the latent preference model is BTT and thus obtain the dataset with ties, the most accurate log-likelihood is:

$$LCE^{BTT}(r, D) = \sum_{(x, y_w, y_l) \in D^{BT}} \log p_r^\theta(y_w \succ y_l | x) + \sum_{(x, y_1, y_2) \in D^T} \log p_r^\theta(y_1 = y_2 | x) \quad (4)$$

Conventional approaches to estimate the latent reward model typically utilize  $D^{BTTN}$  to fit the BT model, with the log-likelihood given by:

$$LCE^{BT}(r, D) = \sum_{(x, y_w, y_l) \in D^{BTTN}} \log p_r(y_w \succ y_l | x) \quad (5)$$

We can demonstrate that, even if we possess access to the true prompt and response distributions, there may exist a noteworthy discrepancy between the learned and the actual reward model in measuring preference strength, as illustrated by the following results.

First, we can establish the relationship between the true reward model  $r^*$  and the learned reward model  $\hat{r}$  by fully optimizing equation 5 in Theorem 4.2.

**Theorem 4.2.**

$$\mathbb{E} [LCE^{BT}(r, D)] \leq \mathbb{E} [LCE^{BT}(\hat{r}, D)], \forall r \neq \hat{r}$$

where  $\hat{r}$  satisfies

$$p_{\hat{r}}(y_1 \succ y_2 | x) = q_{r^*}^\theta(y_1 \succ y_2 | x), \forall x \sim \mathcal{X}, (y_1, y_2) \sim \pi^{\text{SFT}}(y | x) \quad (6)$$

and

$$q_r^\theta(y_1 \succ y_2 | x) = p_r^\theta(y_1 \succ y_2 | x) + \frac{1}{2} p_r^\theta(y_1 = y_2 | x) \quad (7)$$

*Proof.* By Assumption 4.1 we know that the true preference distribution without ties is  $q_r^\theta$ . Therefore, it is equivalent to verify that:

$$\mathbb{E}_{x \sim \mathcal{X}, (y_1, y_2) \sim \pi^{\text{SFT}}(y | x), (y_w, y_l) \sim q_{r^*}^\theta} \left[ \log \frac{p_r(y_w \succ y_l | x)}{p_{\hat{r}}(y_w \succ y_l | x)} \right] \leq 0$$

by Jensen’s inequality we have:

$$\begin{aligned}
& \mathbb{E} \left[ \log \frac{p_r(y_w \succ y_l | x)}{p_{\hat{r}}(y_w \succ y_l | x)} \right] \leq \log \left( \mathbb{E} \left[ \frac{p_r(y_w \succ y_l | x)}{p_{\hat{r}}(y_w \succ y_l | x)} \right] \right) \\
& = \log \left( \mathbb{E}_{(x, y_1, y_2)} \left[ q_{r^*}^\theta(y_1 \succ y_2 | x) \frac{p_r(y_1 \succ y_2 | x)}{p_{\hat{r}}(y_1 \succ y_2 | x)} + q_{r^*}^\theta(y_2 \succ y_1 | x) \frac{p_r(y_2 \succ y_1 | x)}{p_{\hat{r}}(y_2 \succ y_1 | x)} \right] \right) \\
& = \log \left( \mathbb{E}_{(x, y_1, y_2)} [p_r(y_1 \succ y_2 | x) + p_r(y_2 \succ y_1 | x)] \right) \\
& = \log \left( \mathbb{E}_{(x, y_1, y_2)} [1] \right) \\
& = 0
\end{aligned}$$

□

**Theorem 4.3.** *Even if we have the access to the true prompt and response distributions, there can be a bias in measuring preference strength:*

$$\Delta \hat{r} = \Delta r^* + \log \left( \frac{2\theta + (1 + \theta^2) \exp(-\Delta r^*)}{1 + \theta^2 + 2\theta \exp(-\Delta r^*)} \right), \forall (x, y_1, y_2) \quad (8)$$

where  $\Delta r = r(x, y_1) - r(x, y_2)$ .

**Proof Sketch:** From equation 6, we can know that:

$$\begin{aligned}
p_{\hat{r}}(y_1 \succ y_2 | x) &= p_{r^*}^\theta(y_1 \succ y_2 | x) + \frac{1}{2} p_{r^*}^\theta(y_1 = y_2 | x) \\
p_{\hat{r}}(y_2 \succ y_1 | x) &= p_{r^*}^\theta(y_2 \succ y_1 | x) + \frac{1}{2} p_{r^*}^\theta(y_2 = y_1 | x)
\end{aligned}$$

By subtraction, we can get:

$$p_{\hat{r}}(y_1 \succ y_2 | x) - p_{\hat{r}}(y_2 \succ y_1 | x) = p_{r^*}^\theta(y_1 \succ y_2 | x) - p_{r^*}^\theta(y_2 \succ y_1 | x)$$

Consequently, we can derive the relation between  $\Delta \hat{r}$  and  $\Delta r^*$ . Detailed proof can be found in the appendix A.

To analyze the bias term  $\log \left( \frac{2\theta + (1 + \theta^2) \exp(-\Delta r^*)}{1 + \theta^2 + 2\theta \exp(-\Delta r^*)} \right)$ , we can observe that its sign is opposite to  $\Delta r^*$ , indicating that the preference strength is attenuated due to latent preference model mismatch. Additionally, the bias term is a sigmoid-shaped function, bounded by  $\log(\frac{1+\theta^2}{2\theta})$  in absolute value. However, despite this bound, the bias term can still be substantial. As mentioned earlier, Wang et al. (2024) trained 10 different reward models on the Anthropic’s HH-RLHF dataset (Bai et al., 2022), and the mean preference strength of 83.6% of the data falls within the interval  $[-0.6, 2.94]$ . In this range, the ratio between the bias term and  $\Delta r^*$  can be considerable, as depicted in Figure 1.

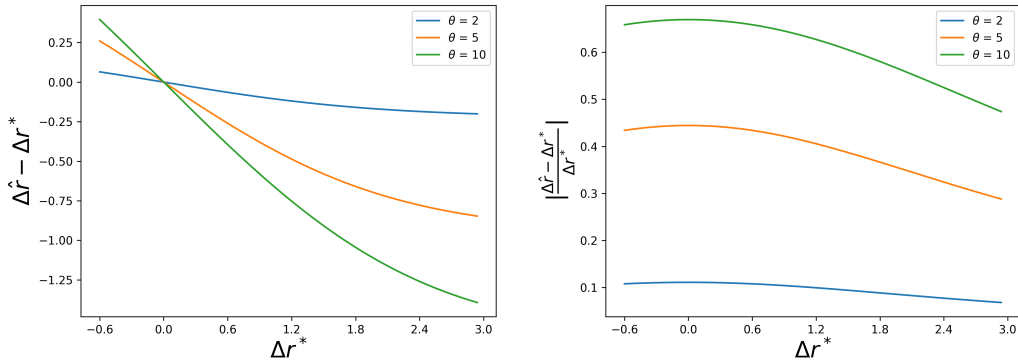

Figure 1: Bias term has a significant impact

### 4.3 PREFERENCE STRENGTH BIAS CORRECTION ALGORITHM

Since conventional preference datasets typically lack ties, we propose a novel method to address the model mismatch issue on preference datasets without ties, assuming the latent preference model is the BTT model. We acknowledge that the right side of equation 8 is a monotonic function with respect to  $\Delta r^*$ , implying a one-to-one mapping relationship between  $\Delta \hat{r}$  and  $\Delta r^*$ . Thus, during the optimization procedure, when obtaining the value of  $\Delta \hat{r}$ , we can treat equation 8 as a nonlinear equation and solve for the value of  $\Delta r^*$ , subsequently subtracting the bias term from the current  $\Delta \hat{r}$ . The detailed description of this method can be found in Alg. 1. We note that this method can be viewed as a variant of DPO with an offset (ODPO) (Amini et al., 2024) when fine tuning with DPO.

---

#### Algorithm 1 Preference Strength Bias Correction

---

**Input:** Preference dataset without ties  $D^{BTTN}$ ,

$\theta$ : Parameter of the BTT model,

$r_\psi$ : Parameterized reward model with parameters  $\psi$ ,

**Output:**  $\psi$

- 1: **while**  $r_\psi$  dose not converge **do**
  - 2:   Calculate the current value of  $r_\psi$ .
  - 3:   Solve the nonlinear equation equation 8 with  $\Delta \hat{r} = \Delta r_\psi$ , and get the value of  $\Delta r^*$ .
  - 4:   Plug  $\Delta r = \Delta r_\psi - \log \left( \frac{2\theta + (1+\theta^2) \exp(-\Delta r^*)}{1 + \theta^2 + 2\theta \exp(-\Delta r^*)} \right)$  into the loss function equation 5.
  - 5:   Perform optimization step for the new loss function.
  - 6: **end while**
  - 7: **return**  $\psi$
- 

## 5 EXPERIMENTS

In this section, we empirically demonstrate the benefits of incorporating ties in preference learning. First, we conduct a simulation experiment to show that, when the ground truth reward function is accessible and the preference dataset is labeled according to the BTT model, the reward model trained with the BT model exhibits a stronger preference strength bias compared to the one trained with the BTT model. Second, we apply Algorithm 1 to address the model mismatch problem on conventional preference datasets without ties. Finally, we use two state-of-the-art open-source LLMs Llama3-70b (abbreviated as Llama) (Meta, 2024) and Qwen2-72b-instruct (abbreviated as Qwen) (Yang et al., 2024) to label whether pairs in Anthropic’s HH-RLHF dataset (Bai et al., 2022) are tied, thereby generating a simulated preference dataset with ties. We then evaluate the fine-tuning using BT and BTT on this dataset. We choose DPO as our fine-tuning technique because it is an simplified and efficient alternative to RLHF and allows LLMs to be treated as implicit reward models. We follow Rafailov et al. (2024), fine-tuning on Anthropic’s HH-RLHF dataset (Bai et al., 2022) and consistently setting  $\beta = 0.1$  for DPO. Additional experimental details can be found in Appendix B.

### 5.1 PREFERENCE BIAS WITH THE GROUND TRUTH REWARD

In this section, we randomly generate a ground truth reward function  $r^*(x, y), x \in \mathbb{N}^+, y \in [0, 1, 2, 3]^n$ , along with a preference dataset labeled by the BTT model using  $r^*$  (with tied pairs randomly assigned preferences). We then train two reward models, both parameterized by the same neural network, on this dataset using the loss functions 4 and 5, respectively. These trained reward models are denoted as  $r^{BTT}$  and  $r^{BT}$ . Next, we evaluate the average preference bias of these two reward models relative to the ground truth reward under varying preference parameters  $\theta$ . The preference bias difference,  $\Delta = |\Delta r^{BT} - \Delta r^*| - |\Delta r^{BTT} - \Delta r^*|$ , is shown in Table 2. From the results, we observe that the preference bias of  $r^{BTT}$  is consistently smaller than that of  $r^{BT}$ , indicating that the BTT model effectively reduces the preference bias with respect to the ground truth reward function, resulting in a more accurate reward model. We also find that as  $\theta$  increases, the preference bias

378 difference becomes larger, which aligns with the trends shown in Figure 1, as a larger  $\theta$  in ground  
 379 truth preference model indicates a higher probability of ties occurring.  
 380

381  
 382 Table 2: The preference bias difference between  $r^{BT}$  and  $r^{BTT}$

| 383 $\theta = 2$ | 383 $\theta = 5$ | 383 $\theta = 10$ |
|------------------|------------------|-------------------|
| 384 0.0206       | 384 0.0237       | 384 0.0353        |

## 385 386 387 388 5.2 DPO WITH A BIAS-CORRECTION OFFSET

389 We apply Alg. 1 to the conventional preference dataset without ties, Anthropic’s HH-RLHF, in order  
 390 to mitigate the bias term using a DPO reward model. It is important to note that this approach can  
 391 be viewed as a variant of the ODPO method (Amini et al., 2024), with the key difference being the  
 392 bias-correction term. We train the small Pythia-160M model (Biderman et al., 2023) for one epoch  
 393 and record the reward preference accuracy on the test set. It is also worth mentioning that we do  
 394 not evaluate Pythia-160M’s inference capability, as the model is too small to generate meaningful  
 395 responses. The experimental results are presented in Table 3. As shown, when  $\theta = 1$ , the bias-  
 396 correction term is consistently zero, which essentially reduces the method to DPO, serving as our  
 397 baseline. From Table 3, we observe that all three ODPO methods, with  $\theta \in \{2, 5, 10\}$ , significantly  
 398 outperform DPO, with ODPO at  $\theta = 5$  showing more than a 10% improvement in accuracy.  
 399

400  
401 Table 3: Test Accuracy of DPO with a bias-Correction offset

| 402 $\theta = 1$ | 402 $\theta = 2$ | 402 $\theta = 5$ | 402 $\theta = 10$ |
|------------------|------------------|------------------|-------------------|
| 403 0.5333       | 403 0.5583       | 403 0.6042       | 403 0.5958        |

404  
405 To further validate the effectiveness of Alg 1, we fine-tuned the larger Pythia-2.8B model (Bider-  
 406 man et al., 2023) on the HH-RLHF dataset using DPO and DPO with a bias-correction offset, and  
 407 evaluated their responses using Llama and Qwen. Due to limited computing resources, we only  
 408 conducted experiments for the optimal  $\theta$ , i.e., 5, as indicated in Table 3. The results, shown in  
 409 Table 4, demonstrate that our method significantly outperforms DPO, confirming the effectiveness  
 410 of the preference strength bias-correction offset. It is important to note that we provide evaluators  
 411 with the option to label ties, and Llama and Qwen may occasionally refuse to evaluate certain offen-  
 412 sive content. Therefore, we only include samples that are clearly evaluated as wins or losses when  
 413 calculating the win rate.  
 414  
 415

416  
417 Table 4: Win rate of DPO with a bias-correction offset against DPO

| 418 Evaluator | 418 Llama  | 418 Qwen   |
|---------------|------------|------------|
| 419 Win rate  | 419 0.5582 | 419 0.5370 |

## 420 421 422 5.3 SYNTHETIC PREFERENCE DATASETS WITH TIES

423 The most compelling experiment is to fine-tune two models using BT and BTT, respectively, on  
 424 a real preference dataset with ties and then compare their win rates. However, due to the lack of  
 425 human-labeled preference datasets with ties and the high cost of manual annotation and evaluation,  
 426 we use an LLM to simulate human judgment and label ties in Anthropic’s HH-RLHF dataset. We  
 427 then fine-tune Pythia-2.8B (Biderman et al., 2023) on this synthetic preference dataset with ties,  
 428 applying the BT and BTT preference models, and evaluate the responses. When using the loss func-  
 429 tion 4, we refer to this approach as TDPO. To reduce bias, we utilize Llama and Qwen, alternately  
 430 as labelers and evaluators. The two labeled preference datasets are summarized in Table 5.  
 431



432  
433  
434  
435  
436  
437  
438  
439  
440  
441  
442  
443  
444  
445  
446  
447  
448  
449  
450  
451  
452  
453  
454  
455  
456  
457  
458  
459  
460  
461  
462  
463  
464  
465  
466  
467  
468  
469  
470  
471  
472  
473  
474  
475  
476  
477  
478  
479  
480  
481  
482  
483  
484  
485

Table 5: Summary of preference datasets with ties

| labeler           | Llama | Qwen |
|-------------------|-------|------|
| # of tied samples | 847   | 3553 |

Figure 2: TDPO win rate against DPO with varying ties sample ratio in preference dataset

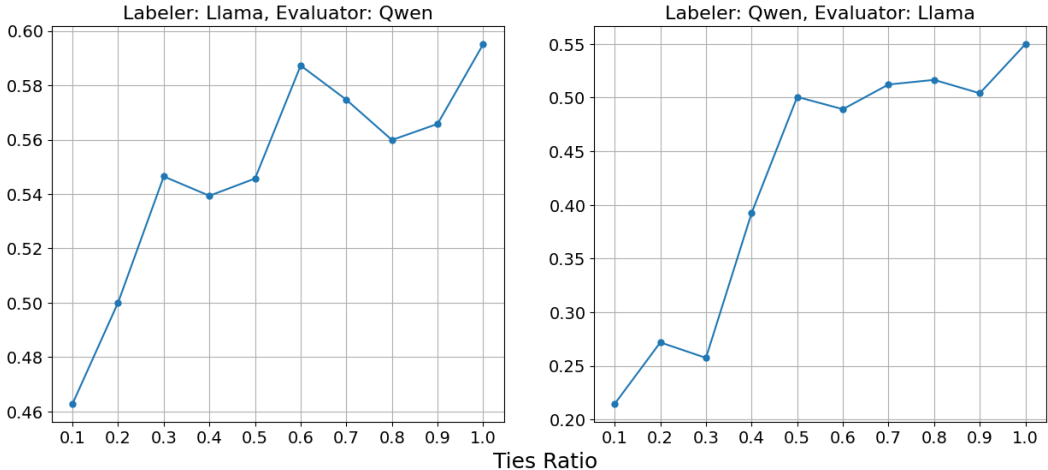

We observe that Anthropic’s HH-RLHF dataset contains over 160k samples, with only a small portion labeled as ties. As a result, directly fine-tuning LLMs on the entire labeled dataset would lead to minimal impact from the tied samples. To emphasize the importance of these tied samples, we train DPO and TDPO on preference datasets with varying percentages of tied samples, with untied samples randomly selected. We still only conducted experiments for the optimal  $\theta$ , i.e., 5, due to limited computing resources. The win rate results are presented in Figure 2. From the results, we observe that, regardless of the labeler and evaluator, the win rate of TDPO increases as the number of tied samples increases, and it significantly exceeds 50% when only tied samples are present. This demonstrates that incorporating BTT with tied samples improves the quality of the trained reward model. Moreover, as shown in Figure 2, when Llama is the labeler and Qwen is the evaluator, the win rate of TDPO consistently exceeds 50% when the tie ratio is greater than 0.2. In contrast, when Qwen is the labeler and Llama is the evaluator, TDPO’s performance is slightly lower. This may be due to Qwen’s less strict criteria for ties, resulting in an overabundance of tied samples.

## 6 DISCUSSION

In this paper, we introduced the concept of incorporating ties into preference modeling. Specifically, we applied the generalized Bradley-Terry model—the Bradley-Terry model with ties—to more accurately capture human preferences. Additionally, we analyzed the bias in measuring preference strength due to model mismatch and proposed a novel method to mitigate this bias. Extensive experiments demonstrate the benefits of considering ties in preference modeling. A limitation of this work is the absence of real human-annotated preference datasets with ties, as collecting such data is both expensive and time-consuming. Future work involving human-labeled preference datasets with ties could significantly improve the effectiveness of preference modeling.

## REFERENCES

- 486  
487  
488 Alan Agresti. *Categorical data analysis*, volume 792. John Wiley & Sons, 2012.
- 489  
490 Afra Amini, Tim Vieira, and Ryan Cotterell. Direct preference optimization with an offset. *arXiv*  
491 *preprint arXiv:2402.10571*, 2024.
- 492  
493 Yuntao Bai, Andy Jones, Kamal Ndousse, Amanda Askell, Anna Chen, Nova DasSarma, Dawn  
494 Drain, Stanislav Fort, Deep Ganguli, Tom Henighan, et al. Training a helpful and harmless  
495 assistant with reinforcement learning from human feedback. *arXiv preprint arXiv:2204.05862*,  
2022.
- 496  
497 Stella Biderman, Hailey Schoelkopf, Quentin Gregory Anthony, Herbie Bradley, Kyle O’Brien, Eric  
498 Hallahan, Mohammad Aflah Khan, Shivanshu Purohit, USVSN Sai Prashanth, Edward Raff, et al.  
499 Pythia: A suite for analyzing large language models across training and scaling. In *International*  
500 *Conference on Machine Learning*, pp. 2397–2430. PMLR, 2023.
- 501  
502 Ralph Allan Bradley and Milton E Terry. Rank analysis of incomplete block designs: I. the method  
of paired comparisons. *Biometrika*, 39(3/4):324–345, 1952.
- 503  
504 Sayak Ray Chowdhury, Anush Kini, and Nagarajan Natarajan. Provably robust dpo: Aligning  
505 language models with noisy feedback. *arXiv preprint arXiv:2403.00409*, 2024.
- 506  
507 Paul F Christiano, Jan Leike, Tom Brown, Miljan Martic, Shane Legg, and Dario Amodei. Deep  
508 reinforcement learning from human preferences. *Advances in neural information processing sys-*  
*tems*, 30, 2017.
- 509  
510 Josef Dai, Xuehai Pan, Ruiyang Sun, Jiaming Ji, Xinbo Xu, Mickel Liu, Yizhou Wang, and  
511 Yaodong Yang. Safe rlhf: Safe reinforcement learning from human feedback. *arXiv preprint*  
*arXiv:2310.12773*, 2023.
- 512  
513 Luyu Gao, Aman Madaan, Shuyan Zhou, Uri Alon, Pengfei Liu, Yiming Yang, Jamie Callan, and  
514 Graham Neubig. Pal: Program-aided language models. In *International Conference on Machine*  
515 *Learning*, pp. 10764–10799. PMLR, 2023.
- 516  
517 Dongyoung Go, Tomasz Korbak, Germán Kruszewski, Jos Rozen, Nahyeon Ryu, and Marc Dymet-  
518 man. Aligning language models with preferences through f-divergence minimization. *arXiv*  
*preprint arXiv:2302.08215*, 2023.
- 519  
520 Tzu-Kuo Huang, Ruby C Weng, Chih-Jen Lin, and Greg Ridgeway. Generalized bradley-terry  
521 models and multi-class probability estimates. *Journal of Machine Learning Research*, 7(1), 2006.
- 522  
523 Timo Kaufmann, Paul Weng, Viktor Bengs, and Eyke Hüllermeier. A survey of reinforcement  
learning from human feedback. *arXiv preprint arXiv:2312.14925*, 2023.
- 524  
525 Zachary Kenton, Tom Everitt, Laura Weidinger, Iason Gabriel, Vladimir Mikulik, and Geoffrey  
526 Irving. Alignment of language agents. *arXiv preprint arXiv:2103.14659*, 2021.
- 527  
528 Tomasz Korbak, Hady Elsahar, Germán Kruszewski, and Marc Dymetman. On reinforcement learn-  
529 ing and distribution matching for fine-tuning language models with no catastrophic forgetting.  
*Advances in Neural Information Processing Systems*, 35:16203–16220, 2022.
- 530  
531 R Duncan Luce. *Individual choice behavior: A theoretical analysis*. Courier Corporation, 2005.
- 532  
533 AI Meta. Introducing meta llama 3: The most capable openly available llm to date. *Meta AI*, 2024.
- 534  
535 Michael Moor, Oishi Banerjee, Zahra Shakeri Hossein Abad, Harlan M Krumholz, Jure Leskovec,  
536 Eric J Topol, and Pranav Rajpurkar. Foundation models for generalist medical artificial intelli-  
gence. *Nature*, 616(7956):259–265, 2023.
- 537  
538 Long Ouyang, Jeffrey Wu, Xu Jiang, Diogo Almeida, Carroll Wainwright, Pamela Mishkin, Chong  
539 Zhang, Sandhini Agarwal, Katarina Slama, Alex Ray, et al. Training language models to fol-  
low instructions with human feedback. *Advances in neural information processing systems*, 35:  
27730–27744, 2022.

- 540 Xue Bin Peng, Aviral Kumar, Grace Zhang, and Sergey Levine. Advantage-weighted regression:  
541 Simple and scalable off-policy reinforcement learning. *arXiv preprint arXiv:1910.00177*, 2019.  
542
- 543 Jan Peters and Stefan Schaal. Reinforcement learning by reward-weighted regression for operational  
544 space control. In *Proceedings of the 24th international conference on Machine learning*, pp. 745–  
545 750, 2007.
- 546 Robin L Plackett. The analysis of permutations. *Journal of the Royal Statistical Society Series C:  
547 Applied Statistics*, 24(2):193–202, 1975.  
548
- 549 Rafael Rafailov, Archit Sharma, Eric Mitchell, Christopher D Manning, Stefano Ermon, and Chelsea  
550 Finn. Direct preference optimization: Your language model is secretly a reward model. *Advances  
551 in Neural Information Processing Systems*, 36, 2024.
- 552 PV Rao and Lawrence L Kupper. Ties in paired-comparison experiments: A generalization of the  
553 bradley-terry model. *Journal of the American Statistical Association*, 62(317):194–204, 1967.  
554
- 555 Feifan Song, Bowen Yu, Minghao Li, Haiyang Yu, Fei Huang, Yongbin Li, and Houfeng Wang.  
556 Preference ranking optimization for human alignment. In *Proceedings of the AAAI Conference  
557 on Artificial Intelligence*, volume 38, pp. 18990–18998, 2024.
- 558 Nisan Stiennon, Long Ouyang, Jeffrey Wu, Daniel Ziegler, Ryan Lowe, Chelsea Voss, Alec Radford,  
559 Dario Amodei, and Paul F Christiano. Learning to summarize with human feedback. *Advances  
560 in Neural Information Processing Systems*, 33:3008–3021, 2020.  
561
- 562 Hugo Touvron, Louis Martin, Kevin Stone, Peter Albert, Amjad Almahairi, Yasmine Babaei, Niko-  
563 lay Bashlykov, Soumya Batra, Prajjwal Bhargava, Shruti Bhosale, et al. Llama 2: Open founda-  
564 tion and fine-tuned chat models. *arXiv preprint arXiv:2307.09288*, 2023.
- 565 Binghai Wang, Rui Zheng, Lu Chen, Yan Liu, Shihan Dou, Caishuang Huang, Wei Shen, Senjie Jin,  
566 Enyu Zhou, Chenyu Shi, et al. Secrets of rlhf in large language models part ii: Reward modeling.  
567 *arXiv preprint arXiv:2401.06080*, 2024.
- 568 An Yang, Baosong Yang, Binyuan Hui, Bo Zheng, Bowen Yu, Chang Zhou, Chengpeng Li,  
569 Chengyuan Li, Dayiheng Liu, Fei Huang, et al. Qwen2 technical report. *arXiv preprint  
570 arXiv:2407.10671*, 2024.  
571
- 572 Zhanhui Zhou, Jie Liu, Chao Yang, Jing Shao, Yu Liu, Xiangyu Yue, Wanli Ouyang, and Yu Qiao.  
573 Beyond one-preference-for-all: Multi-objective direct preference optimization. *arXiv preprint  
574 arXiv:2310.03708*, 2023.
- 575 Banghua Zhu, Michael Jordan, and Jiantao Jiao. Principled reinforcement learning with human feed-  
576 back from pairwise or k-wise comparisons. In *International Conference on Machine Learning*,  
577 pp. 43037–43067. PMLR, 2023.
- 578 Banghua Zhu, Michael I Jordan, and Jiantao Jiao. Iterative data smoothing: Mitigating reward  
579 overfitting and overoptimization in rlhf. *arXiv preprint arXiv:2401.16335*, 2024.  
580
- 581 Daniel M Ziegler, Nisan Stiennon, Jeffrey Wu, Tom B Brown, Alec Radford, Dario Amodei, Paul  
582 Christiano, and Geoffrey Irving. Fine-tuning language models from human preferences. *arXiv  
583 preprint arXiv:1909.08593*, 2019.  
584  
585  
586  
587  
588  
589  
590  
591  
592  
593

## A PROOF OF THEOREM 4.3

*Proof.* From equation 6, we can know that:

$$\begin{aligned} p_{\hat{r}}(y_1 \succ y_2 | x) &= p_{r^*}^\theta(y_1 \succ y_2 | x) + \frac{1}{2} p_{r^*}^\theta(y_1 = y_2 | x) \\ p_{\hat{r}}(y_2 \succ y_1 | x) &= p_{r^*}^\theta(y_2 \succ y_1 | x) + \frac{1}{2} p_{r^*}^\theta(y_2 = y_1 | x) \end{aligned}$$

By subtraction, we can get:

$$p_{\hat{r}}(y_1 \succ y_2 | x) - p_{\hat{r}}(y_2 \succ y_1 | x) = p_{r^*}^\theta(y_1 \succ y_2 | x) - p_{r^*}^\theta(y_2 \succ y_1 | x)$$

Therefore,

$$\begin{aligned} \frac{\exp(\Delta \hat{r})}{1 + \exp(\Delta \hat{r})} - \frac{1}{1 + \exp(\Delta \hat{r})} &= \frac{\exp(\Delta r^*)}{\theta + \exp(\Delta r^*)} - \frac{1}{1 + \theta \exp(\Delta r^*)} \\ \frac{\exp(\Delta \hat{r} - \Delta r^*)}{1 + \exp(\Delta \hat{r})} - \frac{1}{(1 + \exp(\Delta \hat{r})) \exp(\Delta r^*)} &= \frac{1}{\theta + \exp(\Delta r^*)} - \frac{1}{(1 + \theta \exp(\Delta r^*)) \exp(\Delta r^*)} \end{aligned}$$

Then we can get:

$$\begin{aligned} &\exp(\Delta \hat{r} - \Delta r^*) \\ &= (1 + \exp(\Delta \hat{r})) \left[ \frac{1}{\theta + \exp(\Delta r^*)} - \frac{1}{(1 + \theta \exp(\Delta r^*)) \exp(\Delta r^*)} + \frac{1}{(1 + \exp(\Delta \hat{r})) \exp(\Delta r^*)} \right] \\ &= \frac{1 + \exp(\Delta \hat{r})}{\theta + \exp(\Delta r^*)} + \frac{\theta \exp(\Delta r^*) - \exp(\Delta \hat{r})}{(1 + \theta \exp(\Delta r^*)) \exp(\Delta r^*)} \\ &= \frac{1 + \exp(\Delta \hat{r})}{\theta + \exp(\Delta r^*)} + \frac{\theta - \exp(\Delta \hat{r} - \Delta r^*)}{1 + \theta \exp(\Delta r^*)} \end{aligned}$$

Consequently,

$$\exp(\Delta \hat{r} - \Delta r^*) \frac{2 + \theta \exp(\Delta r^*)}{1 + \theta \exp(\Delta r^*)} = \frac{1 + \exp(\Delta \hat{r})}{\theta + \exp(\Delta r^*)} + \frac{\theta}{1 + \theta \exp(\Delta r^*)}$$

Then,

$$\begin{aligned} \exp(\Delta \hat{r} - \Delta r^*) &= \frac{1 + \theta \exp(\Delta r^*)}{2 + \theta \exp(\Delta r^*)} \cdot \frac{1 + \exp(\Delta \hat{r})}{\theta + \exp(\Delta r^*)} + \frac{\theta}{2 + \theta \exp(\Delta r^*)} \\ &= \frac{1 + \theta \exp(\Delta r^*)}{2 + \theta \exp(\Delta r^*)} \cdot \frac{\exp(-\Delta r^*) + \exp(\Delta \hat{r} - \Delta r^*)}{1 + \theta \exp(-\Delta r^*)} + \frac{\theta}{2 + \theta \exp(\Delta r^*)} \\ &= \exp(\Delta \hat{r} - \Delta r^*) \left( 1 - \frac{1 + \theta \exp(\Delta r^*)}{(2 + \theta \exp(\Delta r^*)) (1 + \theta \exp(-\Delta r^*))} \right) \\ &= \exp(\Delta \hat{r} - \Delta r^*) \frac{1 + \theta^2 + 2\theta \exp(-\Delta r^*)}{(2 + \theta \exp(\Delta r^*)) (1 + \theta \exp(-\Delta r^*))} \\ &= \frac{(1 + \theta \exp(\Delta r^*)) \exp(-\Delta r^*)}{(2 + \theta \exp(\Delta r^*)) (1 + \theta \exp(-\Delta r^*))} + \frac{\theta}{2 + \theta \exp(\Delta r^*)} \\ &= \frac{\theta + \exp(-\Delta r^*)}{(2 + \theta \exp(\Delta r^*)) (1 + \theta \exp(-\Delta r^*))} + \frac{\theta}{2 + \theta \exp(\Delta r^*)} \end{aligned}$$

Finally, we can get:

$$\begin{aligned} \exp(\Delta \hat{r} - \Delta r^*) &= \frac{\theta + \exp(-\Delta r^*)}{1 + \theta^2 + 2\theta \exp(-\Delta r^*)} + \frac{\theta (1 + \theta \exp(-\Delta r^*))}{1 + \theta^2 + 2\theta \exp(-\Delta r^*)} \\ &= \frac{2\theta + (1 + \theta^2) \exp(-\Delta r^*)}{1 + \theta^2 + 2\theta \exp(-\Delta r^*)} \end{aligned}$$

Denote

$$f(x) = \frac{2\theta + (1 + \theta^2) \exp(x)}{1 + \theta^2 + 2\theta \exp(x)}$$

648 then we know that:

$$649 \quad f'(x) = \frac{\exp(x)(1-\theta^2)^2}{(1+\theta^2+2\theta\exp(x))^2} \geq 0$$

651 Therefore,

$$652 \quad \frac{2\theta}{1+\theta^2} = \lim_{x \rightarrow -\infty} f(x) \leq f(x) \leq \lim_{x \rightarrow \infty} f(x) = \frac{1+\theta^2}{2\theta}$$

653 Consequently, we have:

$$654 \quad |\Delta\hat{r} - \Delta r^*| \leq \log\left(\frac{1+\theta^2}{2\theta}\right)$$

655 □

## 660 B EXPERIMENT DETAILS

### 661 B.1 EXPERIMENTAL SETUP

662 For each single experiment, we choose the same 64 batch size, RMSprop optimizer,  $1e-5$  learning  
663 rate and  $\beta = 0.1$ . All experiments are conducted on 4 Nvidia A800-80GB GPUs in a single node.

### 664 B.2 WIN RATE PROMPT FOR LLAMA AND QWEN

665 We use the same prompt for Llama and Qwen to evaluate a pair of responses:

666 *For the following query to a chatbot, which response is more helpful?*

667 *Query: [ ]*

668 *Response A: [ ]*

669 *Response B: [ ]*

670 *FIRST provide a one-sentence comparison of the two responses and explain which you feel is more  
671 helpful. SECOND, on a new line, state only "A", "B", "Neither" or "Both" to indicate which  
672 response is more helpful. Your response should use the format: Comparison: [one-sentence com-  
673 parison and explanation] More helpful: ["A", "B", "Neither" or "Both"]*

### 674 B.3 PROMPT FOR LLAMA AND QWEN TO LABEL TIES

675 We use the same prompt for Llama and Qwen to label whether a pair of responses are tied:

676 *For the following query to a chatbot, are the two responses equally good?*

677 *Query: [ ]*

678 *Response A: [ ]*

679 *Response B: [ ]*

680 *Answer with exactly "Yes" or "No".*

648  
649  
650  
651  
652  
653  
654  
655  
656  
657  
658  
659  
660  
661  
662  
663  
664  
665  
666  
667  
668  
669  
670  
671  
672  
673  
674  
675  
676  
677  
678  
679  
680  
681  
682  
683  
684  
685  
686  
687  
688  
689  
690  
691  
692  
693  
694  
695  
696  
697  
698  
699  
700  
701
